# Supplementary material for: Are cattle dangerous to walkers? A scoping review
Source: Inj Prev. 2016 Jan 12;22(6):437–41. doi: 10.1136/injuryprev-2015-041784 (PMC5256230; doi:10.1136/injuryprev-2015-041784)
Supplement: Web supplement [file injuryprev-2015-041784-s1.pdf]

Key: m – male; f - female

| Attack number | Number of papers reporting the attack | Attack date | Location                          | Public footpath | Walkers details                                         | Category of cattle, as described by the media | Actions of the cattle, as described by the media | Presence of a dog and actions of the owner                                                                          | Result of the attack                                               |
|---------------|---------------------------------------|-------------|-----------------------------------|-----------------|---------------------------------------------------------|-----------------------------------------------|--------------------------------------------------|---------------------------------------------------------------------------------------------------------------------|--------------------------------------------------------------------|
| 1             | 5                                     | Nov-10      | Nottinghamshire, Stanford on Soar | yes             | 2: m + f, not residents of the area                     | bull                                          | Charged, attacked. The bull was later euthanised | N/A                                                                                                                 | m killed, f critically injured                                     |
| 2             | 13                                    | Jun-09      | Derbyshire, Peak District         | N/A             | 2: m 62, son 26 (David Blunkett, former Home Secretary) | cow                                           | charging, trample, attack, irate                 | Guide dog, black Labrador-cross, female, put on lead to walk around cattle. Owner tried to release dog but stumbled | broken rib, bruising                                               |
| 3             | 1                                     | Oct-04      | Derbyshire                        | N/A             | f                                                       | cows                                          | knocked down, kicked, stamped                    | N/A                                                                                                                 | punctured lung, broken ribs, severe bruising to face               |
| 4             | 1                                     | Jul-11      | Cornwall, St Dennis               | N/A             | 4: f, m, 2 children                                     | 40 dairy cows                                 | running towards the family                       | Jack Russell, male                                                                                                  | Escaped by diving into a bush                                      |
| 5             | 1                                     | Oct-05      | not stated                        | N/A             | 3: m + 2 children, cycling                              | cow                                           | gore the man                                     | N/A                                                                                                                 | broken ribs, punctured lung, 3 days in intensive care              |
| 6             | 3                                     | May-09      | Beaminster                        | N/A             | 4: m, f 60, 2 friends                                   | 40 cows + calves                              | surrounded, butted, trampled, charged            | 2 Labradors, on short leads                                                                                         | broken ribs, stitches to mouth                                     |
| 7             | 2                                     | Jun-12      | County Durham, Romaldkirk         | yes             | 2: m 46, f, holidaymakers                               | cows                                          | attacked, trampled, reasons unknown              | not thought to have a dog                                                                                           | m: serious injuries to head, back, arms, chest, abdomen. f: unhurt |
| 8             | 2                                     | Oct-10      | North Yorkshire,                  | N/A             | 3: f 50s + m                                            | cows                                          | knocked to the                                   | 2 dogs                                                                                                              | f: broken arm +                                                    |

|    |    |        |                              |                                             |                                            |                                  |                                                             |                                                                                           |                                                                             |
|----|----|--------|------------------------------|---------------------------------------------|--------------------------------------------|----------------------------------|-------------------------------------------------------------|-------------------------------------------------------------------------------------------|-----------------------------------------------------------------------------|
|    |    |        | Redmire                      |                                             | f 48<br><br>separate incidents on same day |                                  | ground, trampled                                            | yes                                                                                       | fractured skull, m: minor cuts and bruises. f broken ribs + collapsed lung  |
| 9  | 12 | Jun-09 | Yorkshire Dales, Pennine Way | N/A                                         | f 49, vet                                  | herd                             | trapped against wall, trampled                              | 2 Spaniels and a Collie possibly sparked the attack. Owner tried to protect dogs          | killed                                                                      |
| 10 | 4  | Jul-09 | Cardiff                      | no public right of way                      | f 63                                       | herd, cows                       | trampled                                                    | Dog ran into herd. Owner went amongst the herd to put dog back on lead                    | killed                                                                      |
| 11 | 1  | Jul-99 | Derbyshire, Peak District    | N/A                                         | m 66                                       | 3 Charolais cows + calves        | charged, attacked, protecting their calves                  | Golden Retriever, on lead, then let off when cows started charging                        | killed                                                                      |
| 12 | 1  | Aug-09 | Somerset, Burtle             | N/A                                         | m 75, farmer                               | herd, farmers own                | scared by fire engine, trampled                             | no                                                                                        | killed                                                                      |
| 13 | 1  | Jun-07 | Hereford, Clehonger          | yes                                         | m, holidaymaker                            | herd of cows + calves            | attacked: cow was standing on man's chest when he was found | dog                                                                                       | dislocated right knee, fractured left wrist, chest injuries                 |
| 14 | 1  | Jun-06 | Pembrokeshire                | yes                                         | f                                          | herd                             | knocked over, trampled                                      | dog                                                                                       | killed                                                                      |
| 15 | 9  | May-03 | Cumbria, Greystoke           | strayed from right of way: footpath blocked | f 45                                       | 20 Simmental-cross cows + calves | attacked, tossed in air, scared by dog                      | Jack Russell, on an extendable lead, startled the cows. Owner picked dog up to protect it | emergency neurosurgery for a head injury, fractured arm + ribs, knee injury |
| 16 | 2  | May-09 | Bristol, Wapley Wood         | yes                                         | m 42                                       | herd: > 20 cows + calves         | trampled                                                    | Jack Russell-Spaniel cross, m, on lead. Owner let go of lead during attack                | broken ribs, severe bruising, black eyes, large lump on head                |
| 17 | 1  | Jul-09 | Bath                         | N/A                                         | m                                          | cow                              | trampled                                                    | N/A                                                                                       | spinal injuries                                                             |

|    |   |        |                                 |     |                    |                       |                              |                                                                  |                                                                                     |
|----|---|--------|---------------------------------|-----|--------------------|-----------------------|------------------------------|------------------------------------------------------------------|-------------------------------------------------------------------------------------|
| 18 | 3 | Jul-99 | Lancashire, Whalley             | yes | m 41, postman      | heifer + calf         | charged, protecting her calf | N/A                                                              | severe spinal injuries                                                              |
| 19 | 2 | Aug-10 | East Sussex, Burwash            | yes | f 42               | herd, 6 cows          | trampled                     | Schnauzer, on lead. Owner let go of lead                         | broken scapular, displaced clavicle, 3 broken ribs, nerve damage, hoof mark on knee |
| 20 | 1 | Aug-07 | East Sussex, South Downs        | N/A | m, Inspector       | 50 beef cattle        | butted, stamped              | N/A                                                              | 4 broken ribs, punctured lung                                                       |
| 21 | 2 | Jul-10 | Gloucestershire, Forest of Dean | N/A | m 55, holidaymaker | cattle                | trampled                     | Airedale Terrier                                                 | serious head injuries                                                               |
| 22 | 1 | Jun-12 | West Yorkshire, Norwood Green   | yes | 2: m 49 + son 9    | 30 to 40 cows         | N/A                          | Dog, on lead, escaped                                            | m unconscious but ok, son escaped                                                   |
| 23 | 1 | Sep-10 | London, Totteridge              | yes | 10: pensioners     | Friesian cow          | N/A                          | N/A                                                              | 1 f: broken leg, 2 with severe bruising                                             |
| 24 | 2 | Oct-12 | Wiltshire, Chippenham           | N/A | f 68               | herd                  | trampled                     | dog: treated for injuries                                        | killed (cardiac arrest)                                                             |
| 25 | 2 | Oct-12 | Wiltshire, Cherhill White Horse | yes | f 57, nurse        | cow                   | trampled                     | 2: Rottweiler and Rottweiler-German Shepherd cross, off the lead | extensive bruising, fractured ribs + fractured shoulder blade                       |
| 26 | 2 | Jun-97 | Windermere, Dales Way           | yes | m, running         | herd of cows          | attacked                     | dog                                                              | face sewn back together, lungs drained, 7 broken ribs                               |
| 27 | 1 | Sep-04 | Derbyshire, Little Longstone    | yes | f                  | herd: 6 cows + calves | trampled                     | dog                                                              | punctured lung, 2 broken ribs, bruising to face                                     |
| 28 | 2 | Oct-07 | Brighton                        | yes | m 50               | 50 + calves           | interested in dog, trampled  | Golden Retriever, on lead. Owner fell and                        | life threatening, punctured lung,                                                   |

|    |   |        |                                 |     |                      |                                                   |                                     |                                                    |                                                                      |
|----|---|--------|---------------------------------|-----|----------------------|---------------------------------------------------|-------------------------------------|----------------------------------------------------|----------------------------------------------------------------------|
|    |   |        |                                 |     |                      |                                                   |                                     | let go of lead. Dog ran away, distracting the cows | broken rib severed an artery                                         |
| 29 | 1 | Jun-09 | Suffolk, South Elmham           | N/A | f 45                 | herd of cows                                      | trampled                            | 2. Owner tried to bring dogs under control         | killed                                                               |
| 30 | 1 | Apr-98 | Oxfordshire, Bloxham            | N/A | f 40s                | herd of cows                                      | trampled                            | Border Terrier. Owner tried to rescue dog          | broken collar bone, punctured lung, broke all 24 ribs                |
| 31 | 1 | Oct-07 | Bedfordshire, Leighton Buzzard  | N/A | m 73, retired doctor | cattle                                            | N/A                                 | N/A                                                | killed                                                               |
| 32 | 2 | Sep-10 | Cambridgeshire, St Neots Common | N/A | m 59                 | cows                                              | trampled, attacked                  | dog                                                | serious chest injuries                                               |
| 33 | 2 | Jul-04 | Cumbria, Askam-in-Furness       | N/A | f 82                 | cows + new-born calves                            | attacked to protect calves from dog | Border Collie                                      | bruising, broken ribs                                                |
| 34 | 2 | Jun-08 | Cheadle, Kingsley               | yes | 2: m 60 + friend     | cow                                               | N/A                                 | Spaniel                                            | m: head injury, multiple rib fractures, bruising to back and abdomen |
| 35 | 1 | Jun-09 | Scotland                        | N/A | f                    | cow                                               | charged                             | N/A                                                | broken ribs                                                          |
| 36 | 1 | May-09 | Isle of Man, Colby              | yes | f 52                 | cow                                               | startled                            | dogs                                               | 6 broken ribs, punctured lung                                        |
| 37 | 1 | Jul-10 | France, Pyrenees                | N/A | f 37                 | cows: several                                     | trampled                            | N/A                                                | unconscious                                                          |
| 38 | 1 | Jul-10 | France, Pyrenees                | N/A | m 50, climbing       | cow                                               | charged                             | N/A                                                | head injuries, cuts to arms                                          |
| 39 | 1 | Jun-09 | Sussex Downs                    | N/A | m, police inspector  | 30 cows                                           | crushed                             | dog                                                | crushed                                                              |
| 40 | 1 | Oct-05 | Oxford, Godstow Lock            | N/A | 2: m 72 + m          | brown heifer, among a group of 10 cows + 2 calves | N/A                                 | dog, on lead                                       | used a walking stick and branch to fend off the cow                  |
| 41 | 2 | Aug-05 | Oxford, Godstow                 | N/A | 3: m 41 +            | French Saler                                      | N/A                                 | N/A                                                | punctured lung,                                                      |

|    |   |        |                                         |     |                               |                                             |                              |                                                                       |                                                                               |
|----|---|--------|-----------------------------------------|-----|-------------------------------|---------------------------------------------|------------------------------|-----------------------------------------------------------------------|-------------------------------------------------------------------------------|
|    |   |        | Lock                                    |     | children; m 14, f 13; cycling | heifer, among a group of 10 cows + 2 calves |                              |                                                                       | broken ribs                                                                   |
| 42 | 1 | Sep-05 | Pembrokeshire                           | N/A | f 55                          | 40 suckler cows + calves                    | trampling, crushing, butting | dog                                                                   | found dead, suffered injuries consistent with trampling, crushing and butting |
| 43 | 1 | Oct-12 | Shropshire, Oswestry                    | N/A | m 46                          | herd                                        | charged, trampled            | dog                                                                   | face, chest and leg injuries                                                  |
| 44 | 1 | Aug-03 | Scotland, Kyle of Lochalsh              | N/A | m                             | cattle + calves                             | N/A                          | no                                                                    | died                                                                          |
| 45 | 1 | Apr-05 | Derbyshire, Baslow Edge                 | N/A | m 58                          | highland cow                                | N/A                          | Dog. Owner walked between mother and calf                             | 6 broken ribs                                                                 |
| 46 | 1 | Oct-03 | Wolvercote, Port Meadow                 | N/A | f 60                          | cow                                         | N/A                          | N/A                                                                   | 2 black eyes, bruising                                                        |
| 47 | 1 | Jun-10 | Derbyshire, Middleton - by - Youlgreave | N/A | m 78                          | herd                                        | N/A                          | N/A                                                                   | died                                                                          |
| 48 | 1 | May-09 | East Sussex, Guestling                  | yes | m 34                          | cows                                        | N/A                          | Bulldog; catapulted into the air by a cow, died as a result.          | broken ribs, bruising                                                         |
| 49 | 1 | Nov-99 | Dartmoor                                | N/A | f 31                          | Black Galloway cow                          | N/A                          | 2 miniature Dachshunds, on leads tied to owners waist, ignored by cow | leg, head and internal injuries                                               |
| 50 | 1 | Aug-10 | East Sussex, Colemans Hatch             | N/A | f                             | Charolais                                   | N/A                          | no                                                                    | ankle injury                                                                  |
| 51 | 1 | Sep-10 | Yorkshire, Dales Way                    | yes | 2: m 66 + f                   | heifer                                      | ignored the dog              | 3 dogs, let off the lead                                              | bruising, cut to face, suspected cracked rib                                  |
| 52 | 1 | Oct-09 | Yorkshire, Dales Way                    | N/A | f                             | cow                                         | N/A                          | N/A                                                                   | N/A                                                                           |

|    |    |        |                        |     |                |                                                              |          |      |                                                        |
|----|----|--------|------------------------|-----|----------------|--------------------------------------------------------------|----------|------|--------------------------------------------------------|
| 53 | 1  | May-07 | Devon, Culmstock       | yes | f 62           | cows                                                         | trampled | dog  | serious chest injuries                                 |
| 54 | 10 | May-13 | Wiltshire, Elbow Field | N/A | 2: m 65 + m 72 | 24 adult crossbreed cattle: mixture of Friesian and Limousin | trampled | dogs | m 65: died<br>m 72: collapsed lung, 'stable' condition |
